# Supplementary material for: Exploring the molecular structure of lipids in the design of artificial lipidated antifungal proteins
Source: Royal Society of Chemistry journal article supplement (doi:10.1039/d3pm00087g), 2024-01-01
Supplement: d3pm00087g1.pdf [file d3pm00087g1.pdf]

## Supplementary Information

# Exploring the molecular structure of lipids in the design of artificial lipidated antifungal proteins

Hendra Saputra,<sup>a</sup> Muhammad Safaat,<sup>a</sup> Kazuki Uchida,<sup>a</sup> Pugoh Santoso,<sup>a</sup>  
Rie Wakabayashi,<sup>a</sup> Masahiro Goto,<sup>a, b</sup> Toki Taira,<sup>c</sup> and Noriho Kamiya<sup>\*a, b</sup>

[a] *Department of Applied Chemistry, Graduate School of Engineering, Kyushu University, 744 Motoooka, Fukuoka 819-0395, Japan.*

[b] *Division of Biotechnology, Center for Future Chemistry, Kyushu University, 744 Motoooka, Fukuoka 819-0395, Japan.*

[c] *Department of Bioscience and Biotechnology, Faculty of Agriculture, University of the Ryukyus, Nishihara-cho, Okinawa 903-0213, Japan*

\*Corresponding author E-mail: [kamiya.noriho.367@m.kyushu-u.ac.jp](mailto:kamiya.noriho.367@m.kyushu-u.ac.jp)

## Table of contents

|       |                                                                                    |     |
|-------|------------------------------------------------------------------------------------|-----|
| 1     | Supplementary information                                                          | S2  |
| 1-1.  | Amino acid sequence of LysM-Q                                                      | S2  |
| 1-2.  | Amino acid sequence of LysM-muGFP-Q                                                | S2  |
| 1-3.  | Molecular structure of lipid-modified peptides                                     | S2  |
| 2     | Supplementary results                                                              | S3  |
| 2-1.  | Results of Fmoc solid phase peptide synthesis                                      | S3  |
| 2-2.  | Conjugation of Q-tagged chitinase domains by MTG                                   | S3  |
| 2-3.  | Qualitative results of antifungal activity test                                    | S4  |
| 2-4.  | Antifungal activity test for LysM-C14 and LysM-C16                                 | S4  |
| 2-5.  | FIC index for LysM-C14 and LysM-C16                                                | S5  |
| 2-6.  | Results of DLS measurements                                                        | S6  |
| 2-7.  | Stability test of the formulation                                                  | S7  |
| 2-8.  | Antifungal activity test with the formulation under different storage conditions   | S8  |
| 2-9.  | CLSM analysis of interaction with <i>T. viride</i>                                 | S9  |
| 2-10. | Statistical analysis of the binding ability of LysM variants with <i>T. viride</i> | S10 |
| 2-11. | CLSM analysis of LysM binding activity with $\alpha$ -chitin                       | S11 |
| 2-12. | Cytotoxicity test of LysM-lipids with HeLa cells                                   | S12 |

## 1. Supplementary information

### 1-1. Amino acid sequence of LysM-Q (pI/Mw: 6.99 / 8739.65)

MCTTYTIKSGDTCYAI SQARGISLSD FESWNAGIDC NNLQIGQVVCVSKPSTSTTPSPT  
PSSSSNGFYPLQMRGGHHHHHH

### 1-2. Amino acid sequence of LysM-muGFP-Q (pI/Mw: 6.04 / 35078.23)

MCTTYTIKSGDTCYAI SQARGISLSD FESWNAGIDC NNLQIGQVVCVSKPSTSTTPSPT  
PSSSSNGHHHHHHH SKGEELFTGVVPII LVELDGDVNGHKFSVRGEGEGDATNGKLT LKFI  
CTTGKLPVPWPTLVTT LTYGVL CFSRYPDHMKRHDFFKSAMPEGYVQERTISFKDDGTY  
KTRAEVKFEGDTLVNRIELK GIDFKEDGNILGHKLEYNFNSHNVIITADKQKNGIKAYF  
KIRHNVEDGSVQLADHYQQNTPIGDGPVLLPDNHYLSTQSVLSKDPNEKRDHMLLEDV  
TAAGITHGMDELYRGGGSL LQG

Brown: LysM2 domain

Blue: Linker sequences derived from PrChiA

Green: Hexahistidine tag

Purple: Q-tag (FYPLQMRGG)

Dark Green: muGFP

Orange: Q-tag (LLQG)

### 1-3. Molecular structure of lipid-modified peptides

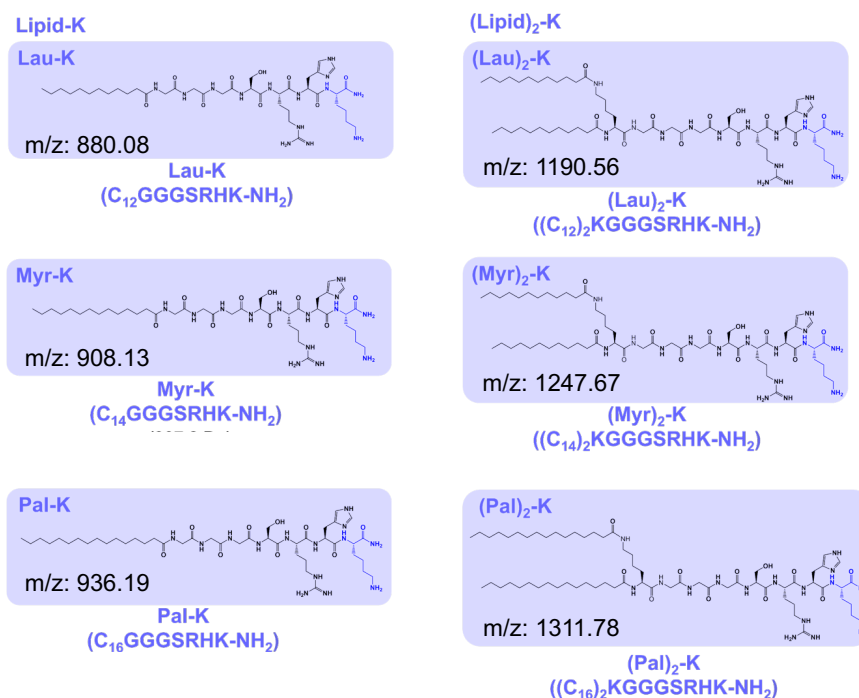

**Figure S1.** Chemical structures of lipid-G<sub>3</sub>S-RHK and (lipid)<sub>2</sub>-K-G<sub>3</sub>S-RHK with the values of theoretical molecular weight.

## 2. Supplementary results

### 2-1. Results of Fmoc solid phase peptide synthesis

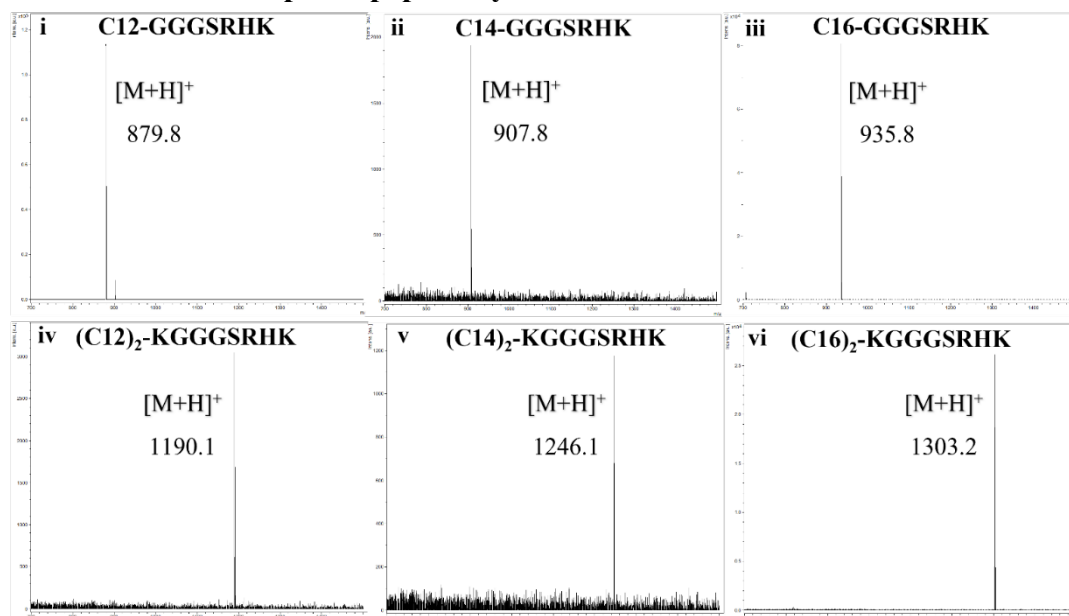

**Figure S2.** MALDI-TOF-MS results of lipid-GGGS-RHK and (lipid)<sub>2</sub>-KGGGS-RHK. (i) C12-, (ii) C14-, (iii) C16-GGGS-RHK, (iv) (C12)<sub>2</sub>-, (v) (C14)<sub>2</sub>-, and (vi) (C16)<sub>2</sub>-KGGGS-RHK.

### 2-2. Conjugation of Q-Tagged chitinase domains by MTG

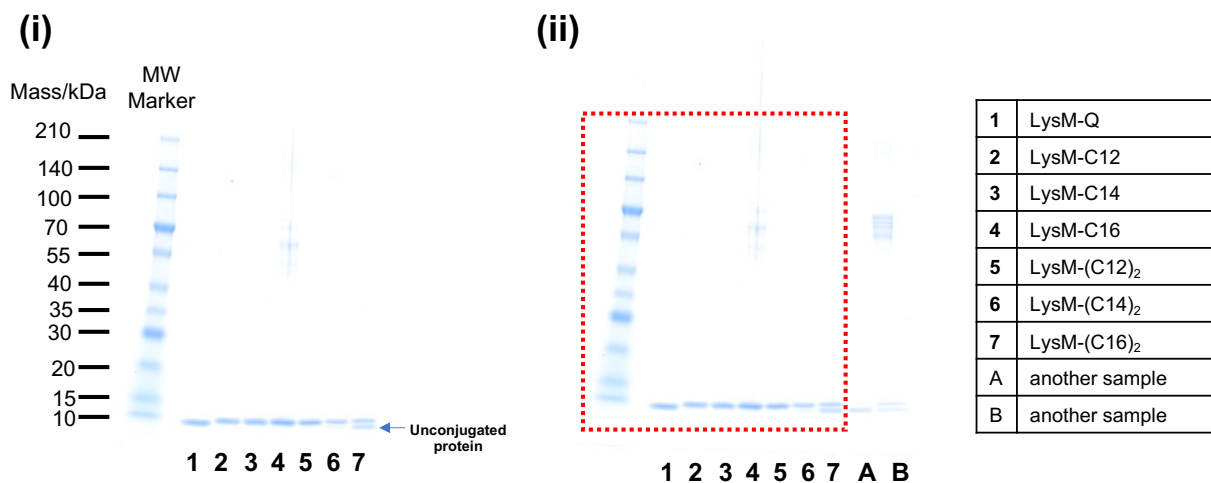

**Figure S3.** (i) SDS-PAGE analysis of unmodified chitinase and chitinase modified with C12-K, C14-K, C16-K, (C12)<sub>2</sub>-K, (C14)<sub>2</sub>-K and (C16)<sub>2</sub>-K by MTG. All conjugation reactions were carried out with 10 μM Q-tagged chitinase domains, 1% DDM, 10 μM Lipid-K, and 0.1 U/mL MTG in 10 mM Tris-HCl (pH 8.0) at 37 °C for 1 h. (ii) The raw image of SDS-PAGE gel (rectangular box with red dotted line denotes the part used for (i)).

### 2-3. Qualitative results of antifungal activity test

| AmB<br>( $\mu\text{M}$ ) | LysM-<br>Q | LysM-<br>C12 | LysM-<br>C14 | LysM-<br>C16 | LysM-<br>(C12) <sub>2</sub> | LysM-<br>(C14) <sub>2</sub> | Blank | 100% | 0% |
|--------------------------|------------|--------------|--------------|--------------|-----------------------------|-----------------------------|-------|------|----|
|--------------------------|------------|--------------|--------------|--------------|-----------------------------|-----------------------------|-------|------|----|

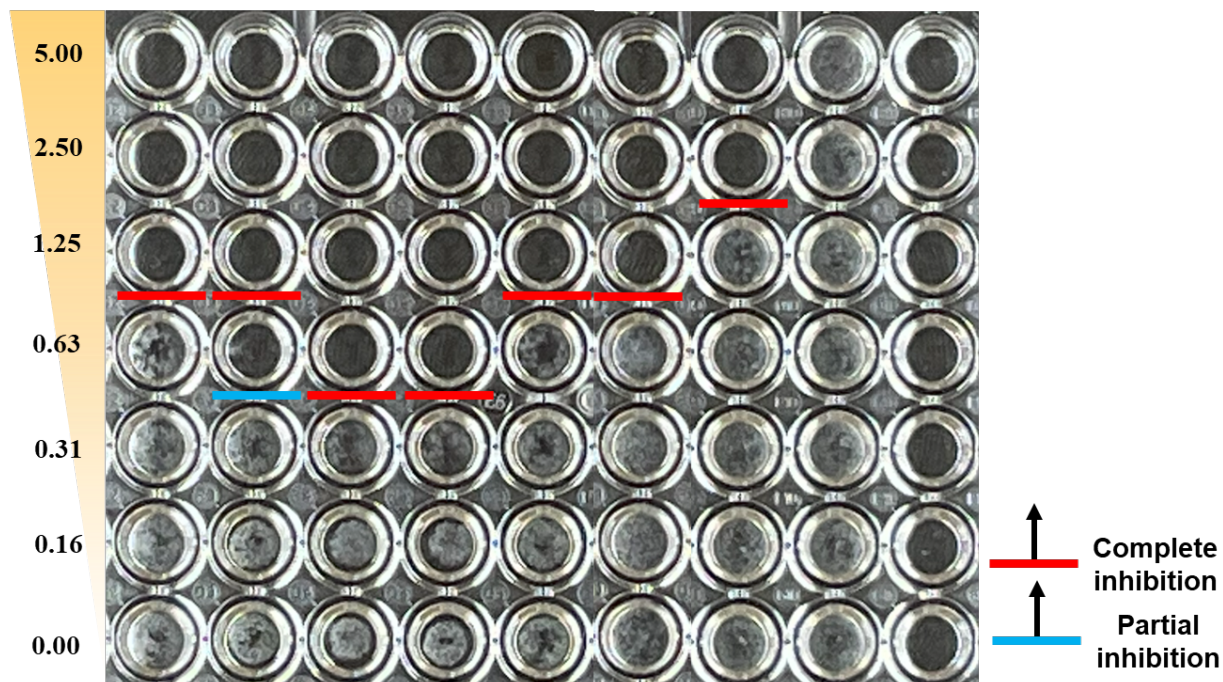

**Figure S4.** Representative image of a 96-well plate after culturing *T. viride* in the presence of 0–5  $\mu\text{M}$  of AmB with 1  $\mu\text{M}$  of each sample at 60h.

### 2-4. Antifungal activity test for LysM-C14 and LysM-C16

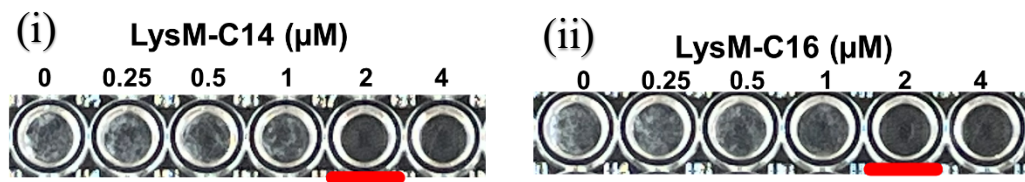

**Figure S5.** MIC of LysM-C14 (i) and LysM-C16 (ii) in 20 mM NaPi, pH 7.4, 25°C at 60 h.

## 2-5. FIC index for LysM-C14 and LysM-C16

$$FIC\ index = \frac{A}{MIC_A} + \frac{B}{MIC_B} = FIC_A + FIC_B \quad (1)$$

The fractional inhibitory concentration (FIC) index was estimated by the above equation (1). “A” refers to the the minimum inhibitory concentration (MIC) value of AmB in combination with LysM-lipid, where “MIC<sub>A</sub>” refers to MIC of AmB alone. “B” refers to the MIC value of LysM-lipid in combination with AmB, where “MIC<sub>B</sub>” refers to the MIC of LysM-lipid alone. These values added together output the FIC index value, where < 0.5 indicates synergy, 0.5-4 for indifference, and > 4 for antagonism [16].

### A. FIC index of LysM-C14

|                        |                     |             |                  |
|------------------------|---------------------|-------------|------------------|
| <b>MIC<sub>A</sub></b> | AmB Only            | <b>2.5</b>  | (see Fig. S4)    |
| <b>A</b>               | AmB combination     | <b>0.63</b> | (see Fig. S4)    |
| <b>MIC<sub>B</sub></b> | Protein only        | <b>2</b>    | (see Fig. S5(i)) |
| <b>B</b>               | Protein combination | <b>1</b>    | (see Fig. S4)    |

$$FIC\ index\ of\ AMB\ and\ LysM - C14 = \left(\frac{0.63}{2.5}\right) + \left(\frac{1}{2}\right) = 0.752$$

### B. FIC index of LysM-C16

|                        |                     |             |                   |
|------------------------|---------------------|-------------|-------------------|
| <b>MIC<sub>A</sub></b> | AmB Only            | <b>2.5</b>  | (see Fig. S4)     |
| <b>A</b>               | AmB combination     | <b>0.63</b> | (see Fig. S4)     |
| <b>MIC<sub>B</sub></b> | Protein only        | <b>2</b>    | (see Fig. S5(ii)) |
| <b>B</b>               | Protein combination | <b>1</b>    | (see Fig. S4)     |

$$FIC\ index\ of\ AMB\ and\ LysM - C16 = \left(\frac{0.63}{2.5}\right) + \left(\frac{1}{2}\right) = 0.752$$

## 2-6. Results of DLS measurements

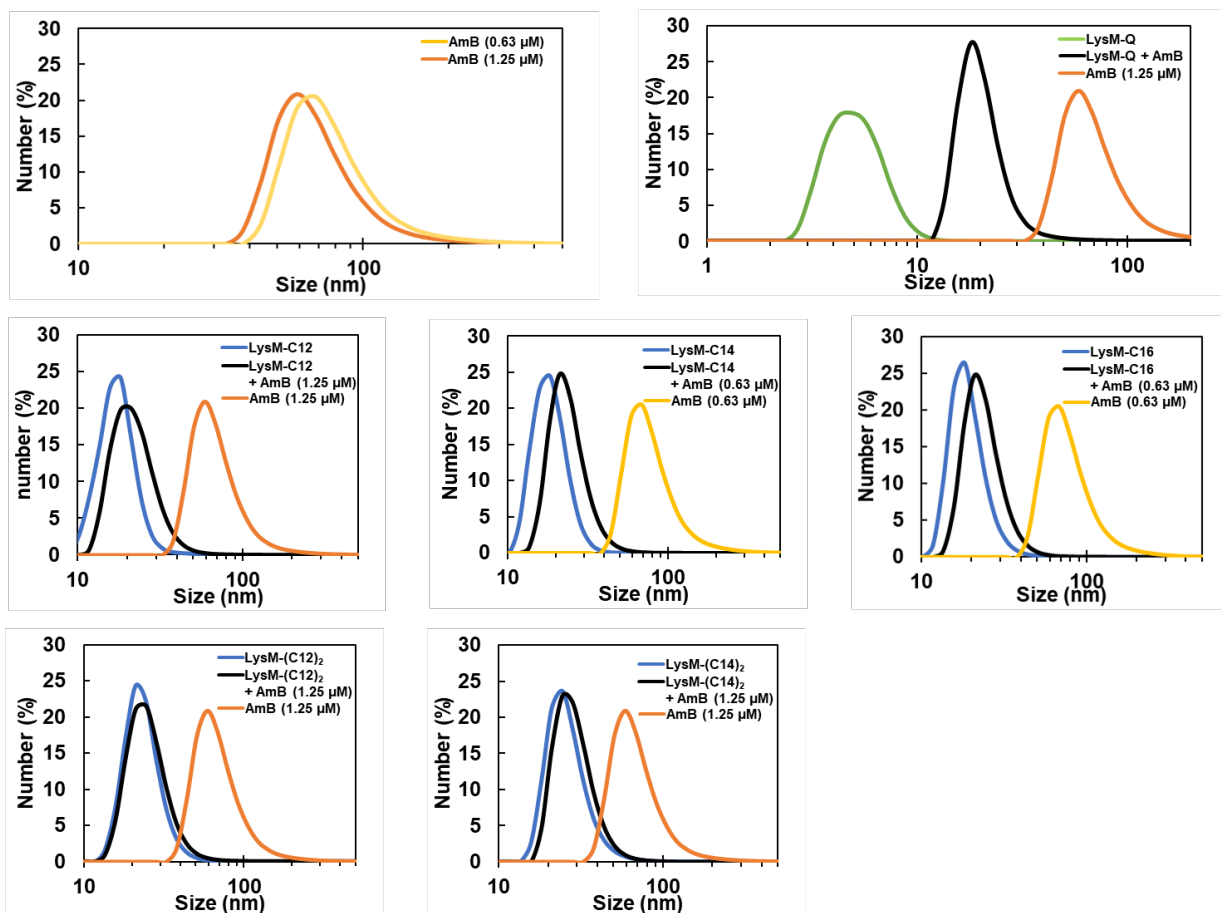

**Figure S6.** DLS measurements of AmB with LysM-Q or LysM-lipid in 20 mM NaPi, pH 7.4 at 25°C.

## 2-7. Stability test of the formulation

### (i) AmB + LysM-C14

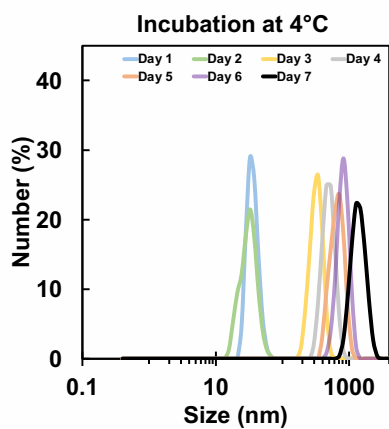

|       | Size (nm)  |
|-------|------------|
| Day 0 | 21.2 ± 3.1 |
| Day 1 | 34.4 ± 2.9 |
| Day 2 | 29.9 ± 4.7 |
| Day 3 | 313 ± 50   |
| Day 4 | 486 ± 78   |
| Day 5 | 652 ± 105  |
| Day 6 | > 800      |
| Day 7 | > 800      |

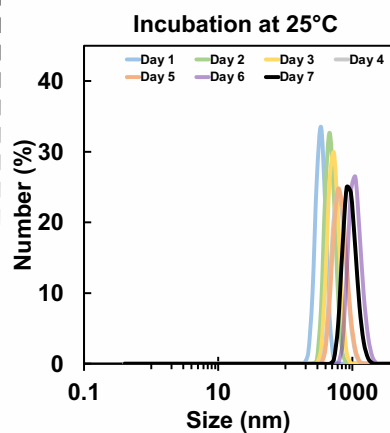

|       | Size (nm)  |
|-------|------------|
| Day 0 | 21.2 ± 3.1 |
| Day 1 | 326 ± 21   |
| Day 2 | 486 ± 78   |
| Day 3 | 507 ± 42   |
| Day 4 | 619 ± 91   |
| Day 5 | 647 ± 56   |
| Day 6 | > 800      |
| Day 7 | > 800      |

### (ii) AmB + LysM-C16

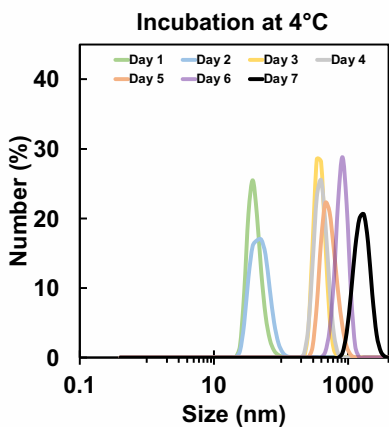

|       | Size (nm)  |
|-------|------------|
| Day 0 | 22.1 ± 2.0 |
| Day 1 | 38.1 ± 5.6 |
| Day 2 | 39.8 ± 3.5 |
| Day 3 | 360 ± 31   |
| Day 4 | 378 ± 31   |
| Day 5 | 483 ± 42   |
| Day 6 | > 800      |
| Day 7 | > 800      |

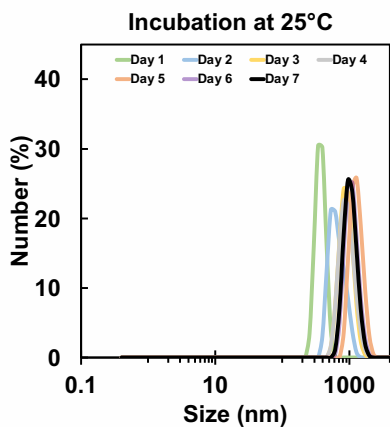

|       | Size (nm)  |
|-------|------------|
| Day 0 | 22.1 ± 2.0 |
| Day 1 | 360 ± 31   |
| Day 2 | 619 ± 91   |
| Day 3 | > 800      |
| Day 4 | > 800      |
| Day 5 | > 800      |
| Day 6 | > 800      |
| Day 7 | > 800      |

**Figure S7.** DLS measurements of AmB with LysM-C14 (i) or LysM-C16 (ii) during incubation at 4°C or 25°C in 20 mM NaPi (pH 7.4).



## 2-8. Antifungal activity test with the formulation under different storage conditions

(i) Storage Day 1

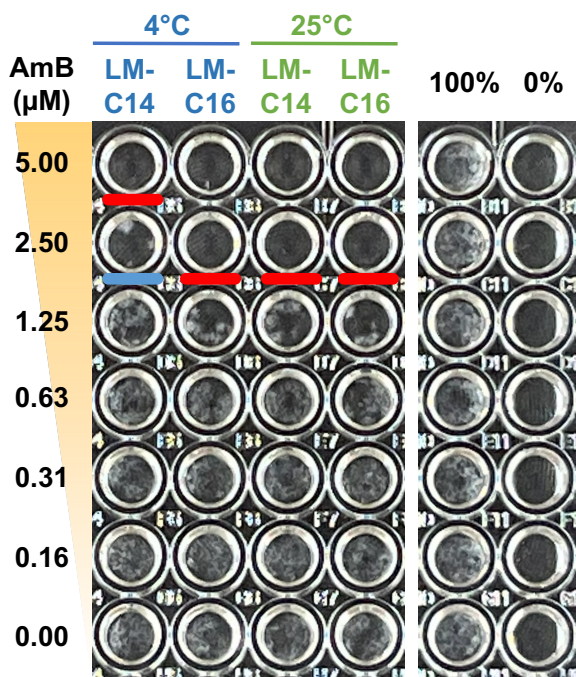

(ii) Storage Day 7

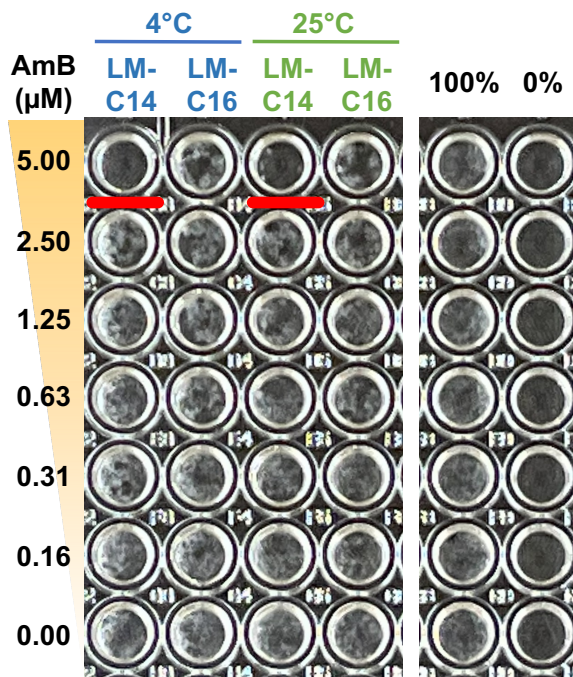

**Figure S8.** Representative image of a 96-well plate after culturing *T. viride* for 60 h in the presence of 0–5  $\mu\text{M}$  of AmB with 1  $\mu\text{M}$  of LysM-C14 and LysM-C16 under different storage conditions. (i) The formulation after 1 day of storage (Day 1) and (ii) after 7 days of storage (Day 7).



## 2-9. CLSM analysis of interaction with *T. viride*

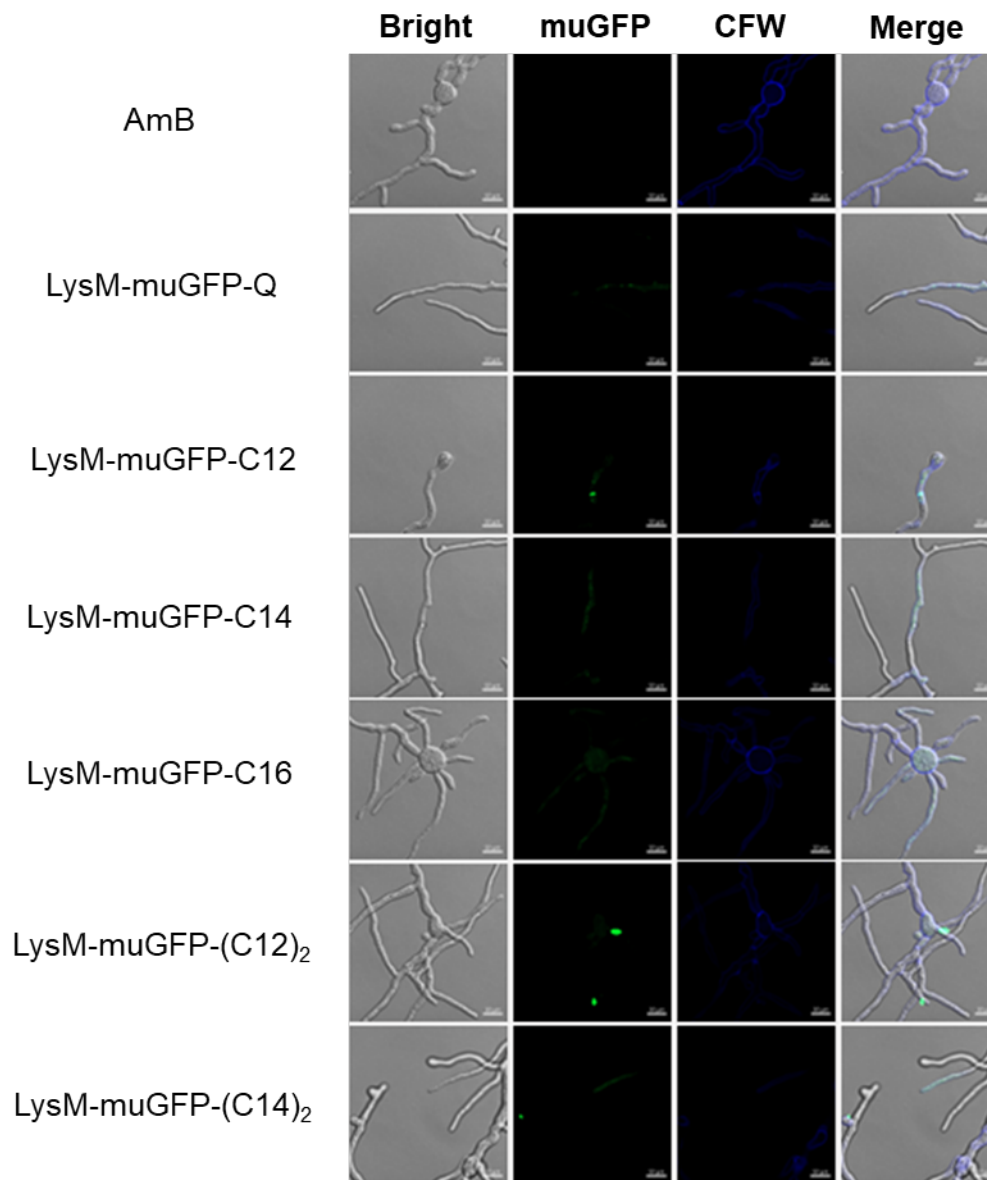

**Figure S9.** CLSM analyses of LysM-muGFP-Q or LysM-muGFP-lipid and combination without AMB in the presence of *T. viride* hyphae in 20 mM NaPi, pH 7.4, at 25°C (bars: 10  $\mu$ m).

2-10. Statistical analysis of the binding ability of LysM variants with *T. viride*

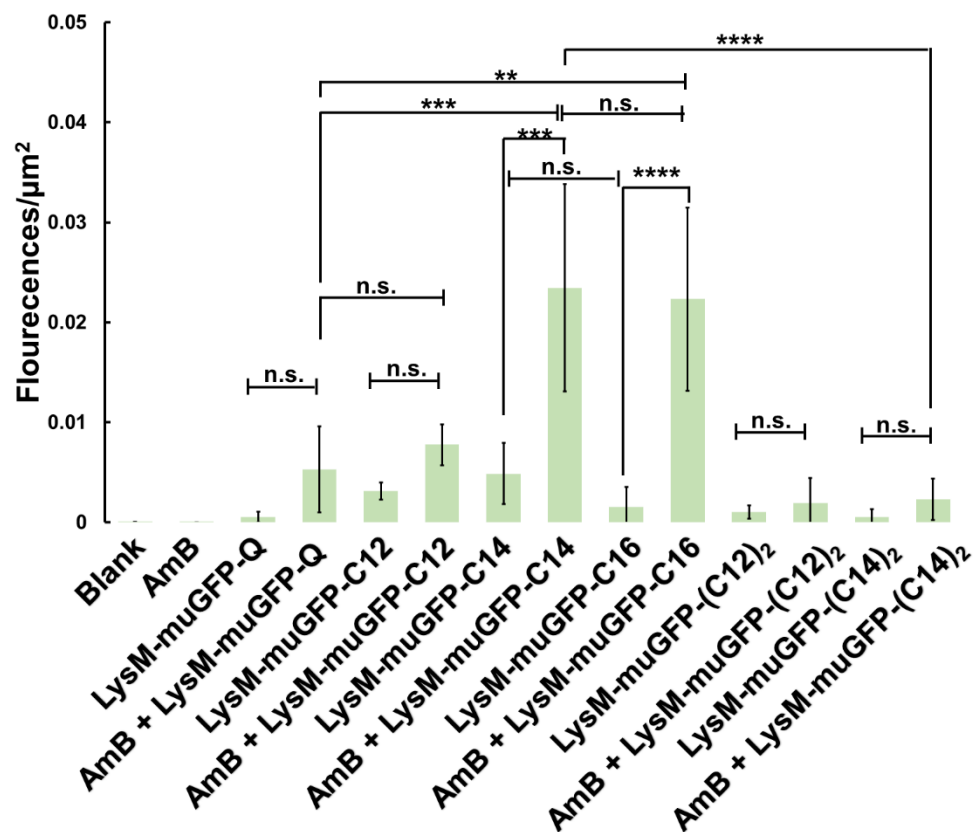

**Figure S10.** Statistical analysis of the fluorescence imaging results by CLSM (Fig. 3b).  $N = 3$ ; mean  $\pm$  SE; \*\* $p < 0.01$ , \*\*\* $p < 0.001$ , \*\*\*\* $p < 0.0001$ . “n.s.” indicates not significant ( $p > 0.05$ ) (ANOVA followed by Tukey’s multiple comparisons test).

## 2-11. CLSM analysis of LysM binding activity with $\alpha$ -chitin

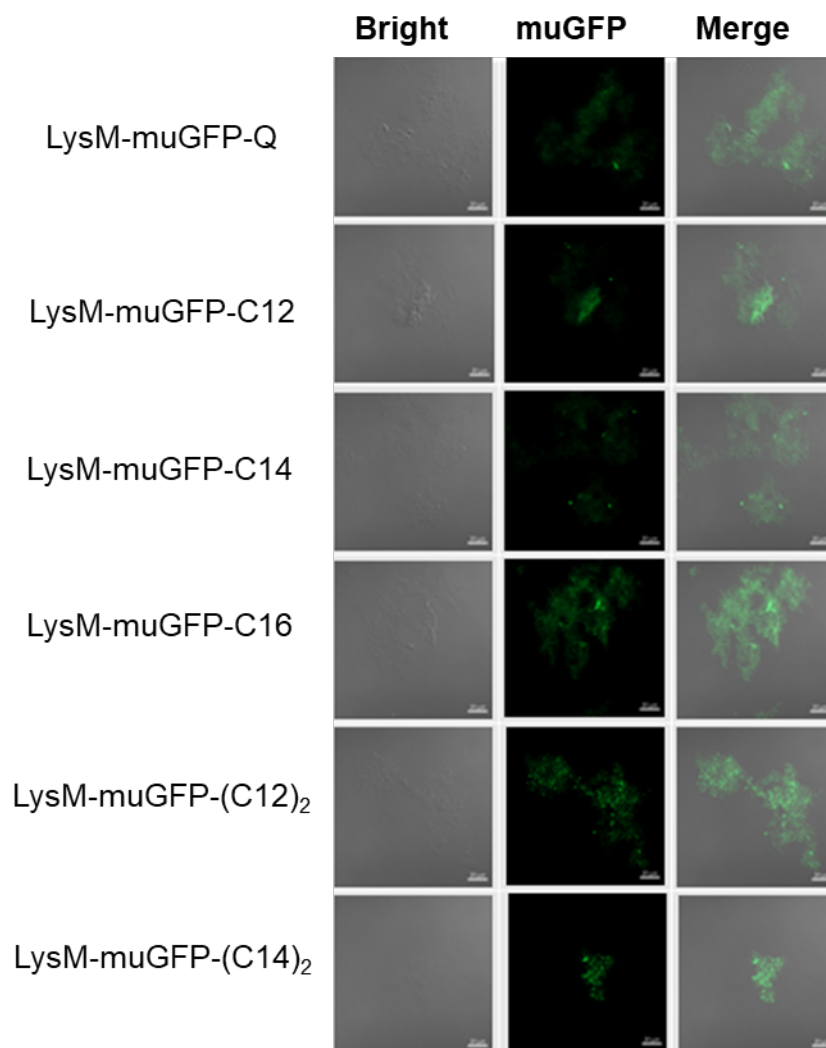

**Figure S11.** CLSM analyses of LysM-muGFP-Q or LysM-muGFP-lipid in the presence of 0.5%  $\alpha$ -chitin in 20 mM NaPi, pH 7.4, at 25°C (bars: 10  $\mu$ m).

## 2-12. Cytotoxicity test of LysM-lipids with HeLa cells

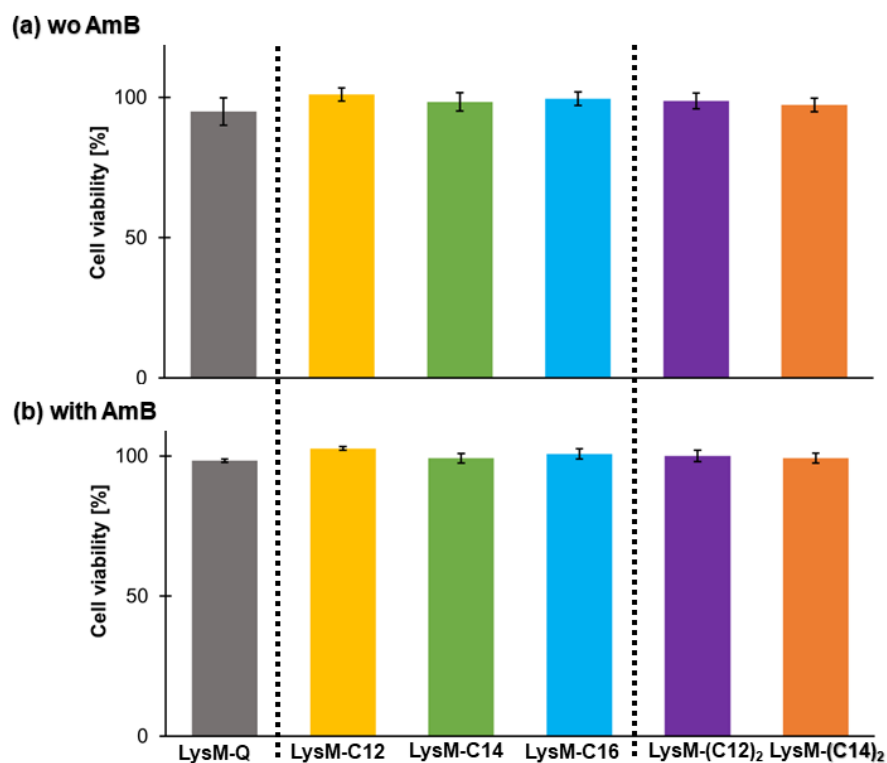

**Figure S12.** Cell viability of combination chitinase modified and AmB in HeLa cells (5,000 cell/well). Cell viability was quantified by Cell Counting Kit-8 (Dojindo) (A) without AmB and (B) with AmB.
